# Supplementary material
Source: publisher figshare collection journal article supplement (https://tandf.figshare.com/ndownloader/files/15353918)
Supplement: Supplementary file 1 [file 15353918]

**Supplemental figures and tables**

Table S1. The p-values based on three-way analysis of variance (factors = ± hairy vetch, ± charcoal and two moisture steps) of the inorganic-N data (total inorganic-N, ammonium-N (NH4+-N) and nitrate-N (NO3−-N)) for each sampling day. The significances are shown as * (p < 0.05), *** (p < 0.001).

| Source | Df |  | | | |
| --- | --- | --- | --- | --- | --- |
|  |  | Total inorganic-N | | | |
|  |  | Day 3 | Day 11 | Day 18 | Day 28 |
| Hairy vetch | 1 | *** | *** | *** | *** |
| Moisture | 1 |  |  |  | ** |
| Charcoal | 1 |  |  |  | * |
| Hairy vetch * Moisture | 1 |  |  |  | ** |
| Hairy vetch * Charcoal | 1 |  |  |  | * |
| Moisture * Charcoal | 1 |  |  |  |  |
| Hairy vetch * Moisture * Charcoal | 1 |  |  |  |  |
| Residuals | 16 |  |  |  |  |
|  |  | NH4+-N | | | |
|  |  | Day 3 | Day 11 | Day 18 | Day 28 |
| Hairy vetch | 1 | *** | *** | *** | *** |
| Moisture | 1 |  |  |  | * |
| Charcoal | 1 |  |  | * | * |
| Hairy vetch * Moisture | 1 |  |  |  | * |
| Hairy vetch * Charcoal | 1 |  |  | * | * |
| Moisture * Charcoal | 1 |  |  |  |  |
| Hairy vetch * Moisture * Charcoal | 1 |  |  |  |  |
| Residuals | 16 |  |  |  |  |
|  |  | NO3−-N | | | |
|  |  | Day 3 | Day 11 | Day 18 | Day 28 |
| Hairy vetch | 1 | *** | *** | ** | *** |
| Moisture | 1 |  |  |  | ** |
| Charcoal | 1 | * |  |  |  |
| Hairy vetch * Moisture | 1 |  |  |  | *** |
| Hairy vetch * Charcoal | 1 | ** |  |  |  |
| Moisture * Charcoal | 1 |  |  |  | * |
| Hairy vetch * Moisture * Charcoal | 1 | * |  |  | * |
| Residuals | 16 |  |  |  |  |


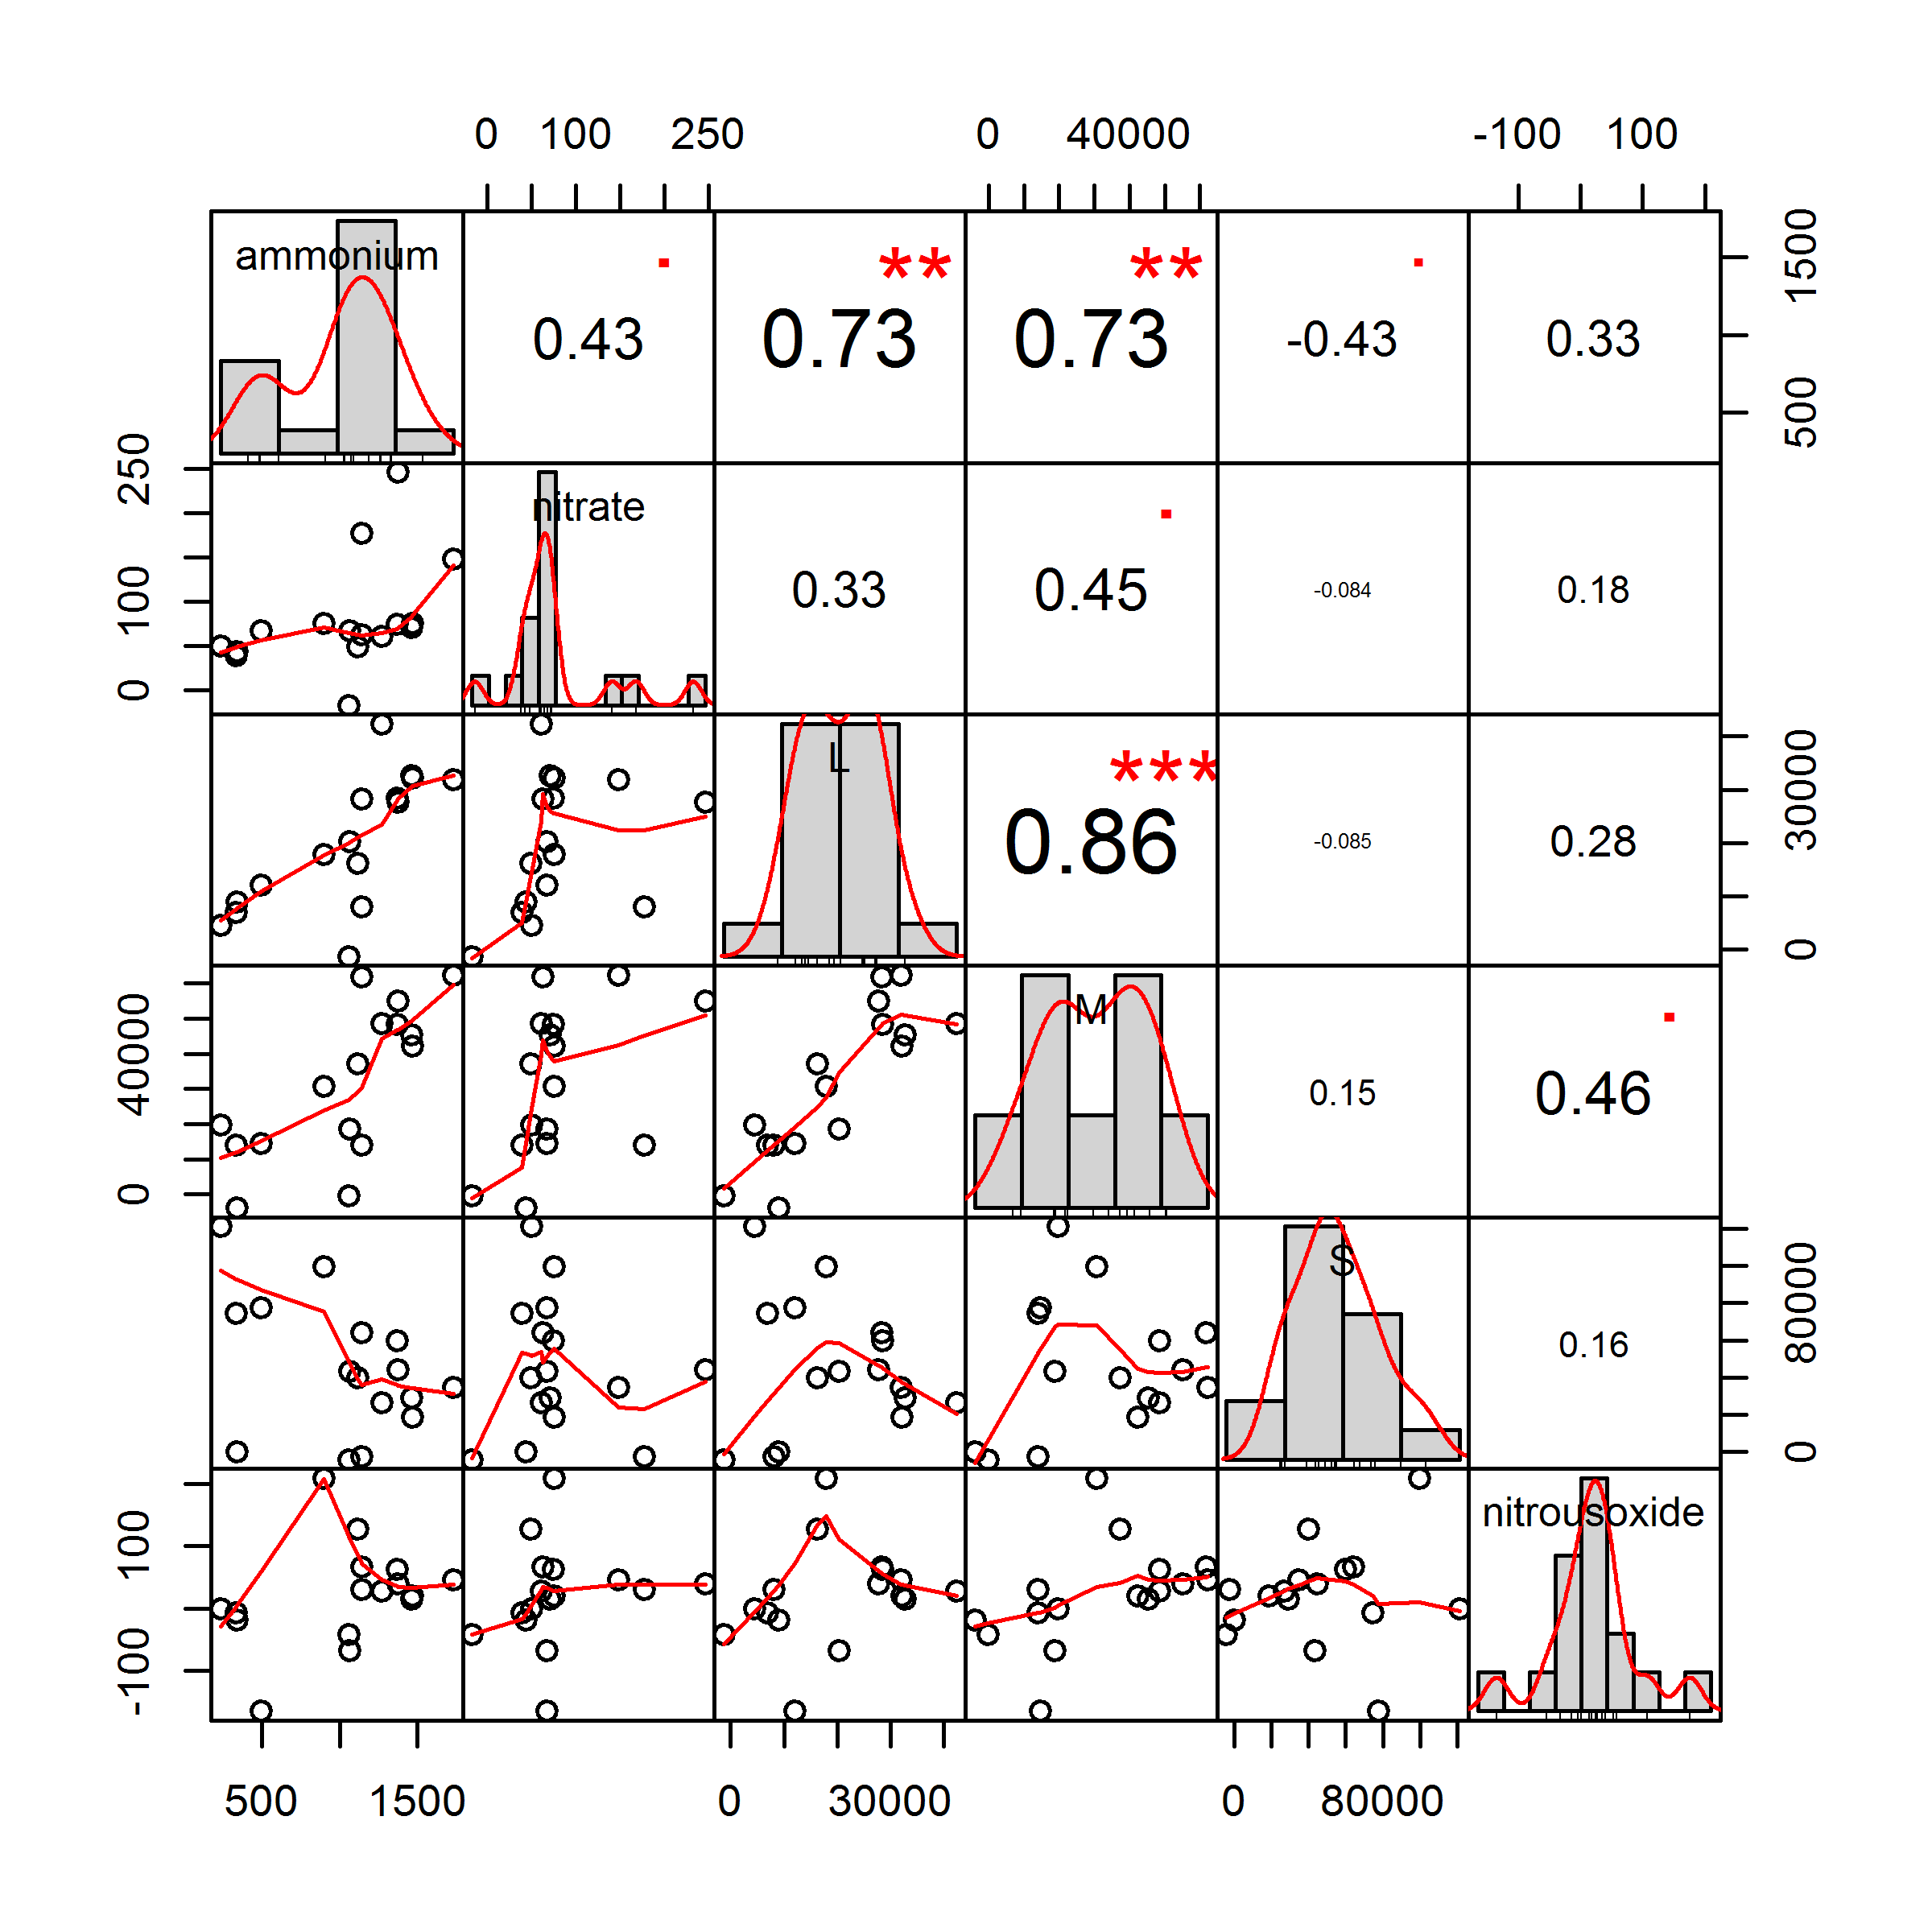


Figure S1. The Pearson’s correlation coefficients among the measured soil properties. Each value is the difference between with and without hairy vetch treatments (with hairy vetch − without hairy vetch). The letter L, M and S express the fraction of the inorganic-N. The significance (p values) is expressed as “.” , “*”, “**” and “***” for p < 0.1, < 0.05, <0.01 and <0.001, respectively.
